# Supplementary material for: Toughened aromatic poly-(decylene terephthalate) copolyesters with two renewable eugenol-based components via a random copolymerization method
Source: Royal Society of Chemistry journal article supplement (doi:10.1039/c5py01699a), 2015-12-17
Supplement: c5py01699a1.pdf [file c5py01699a1.pdf]

**Supplementary Information for**  
**Toughened aromatic poly-(decylene terephthalate) copolyesters**  
**with two renewable eugenol-based components *via* a**  
**random copolymerization method**

Keling Hu,<sup>a</sup> Dongping Zhao,<sup>a</sup> Guolin Wu\*<sup>a</sup> and Jianbiao Ma\*<sup>b</sup>

<sup>a</sup> Key Laboratory of Functional Polymer Materials of MOE, Institute of Polymer Chemistry,

Nankai University, Tianjin 300071, P. R. China

<sup>b</sup> School of Chemistry and Chemical Engineering, Tianjin University of Technology, Tianjin

300191, P. R. China

Correspondence to: guolinwu@hotmail.com

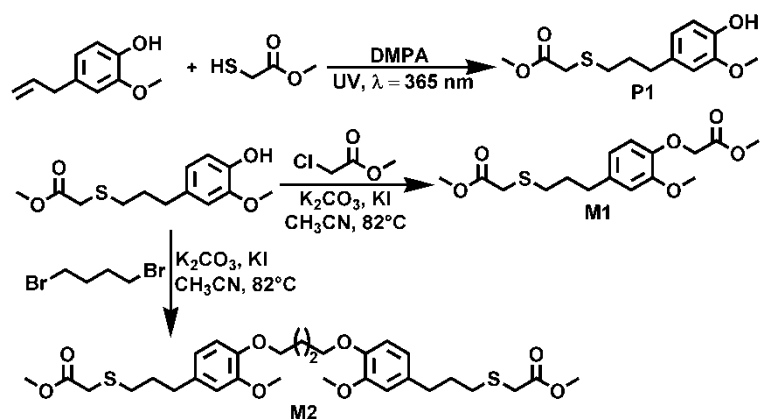

**Scheme S1** Synthetic routes for the preparation of precursor **P1** and tougheners **M1**, **M2** via a thiol-ene click and nucleophilic substitutions.

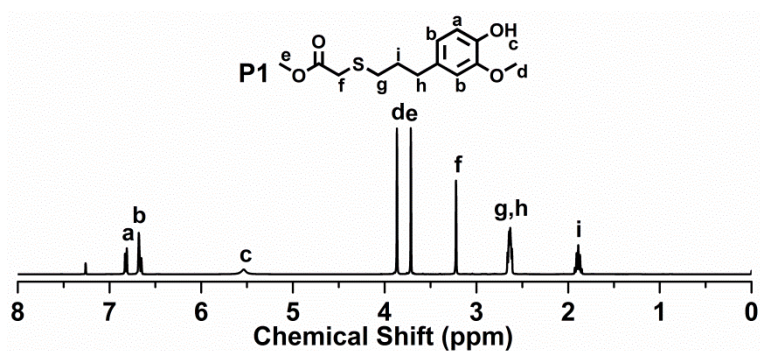

**Fig. S1**  $^1\text{H}$  NMR spectrum of **P1**.

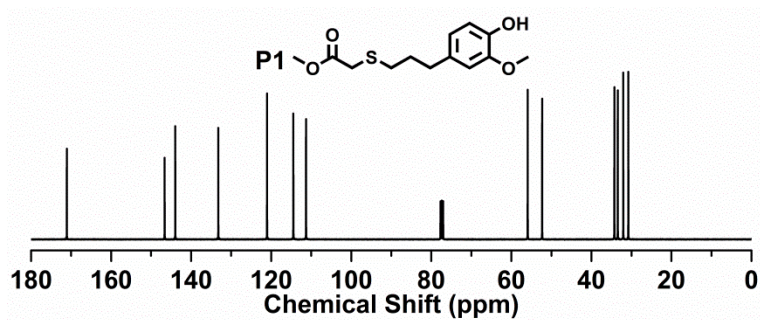

**Fig. S2**  $^{13}\text{C}$  NMR spectrum of **P1**.

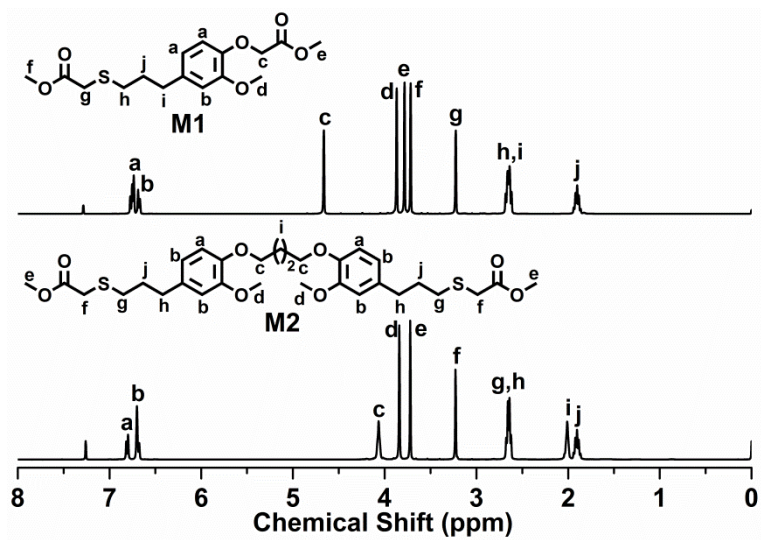

Fig. S3  $^1\text{H}$  NMR spectra of M1 and M2.

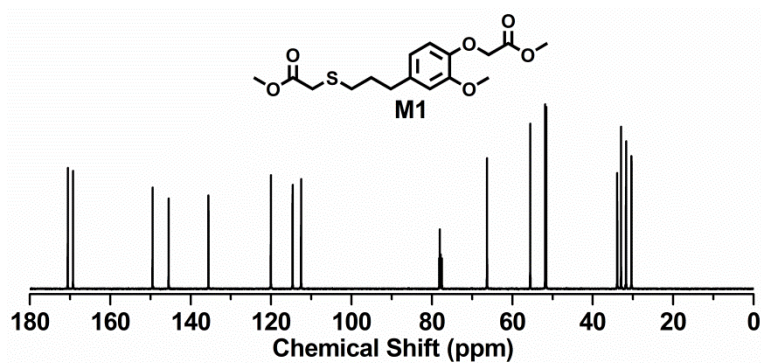

Fig. S4  $^{13}\text{C}$  NMR spectrum of M1.

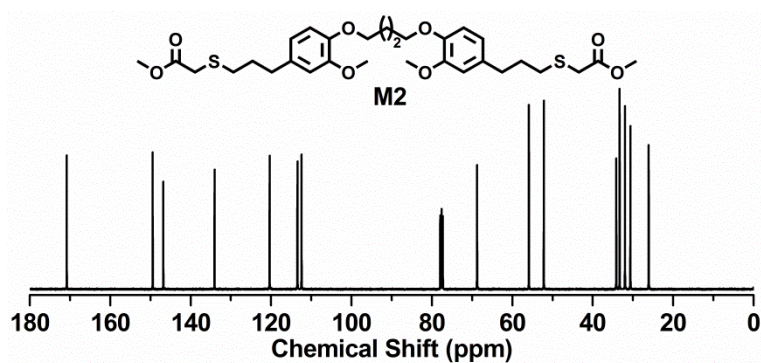

Fig. S5  $^{13}\text{C}$  NMR spectrum of M2.

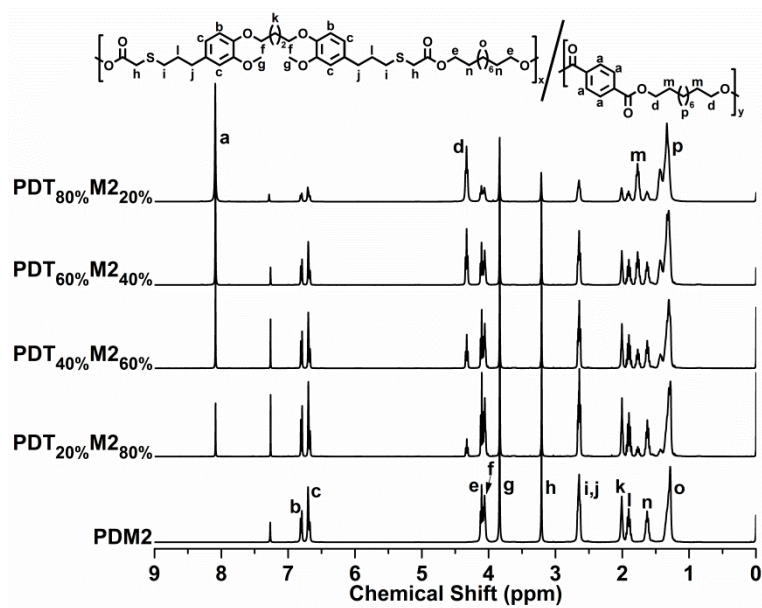

Fig. S6  $^1\text{H}$  NMR spectra of  $\text{PDT}_{1-x}\text{M2}_x$  copolyesters.

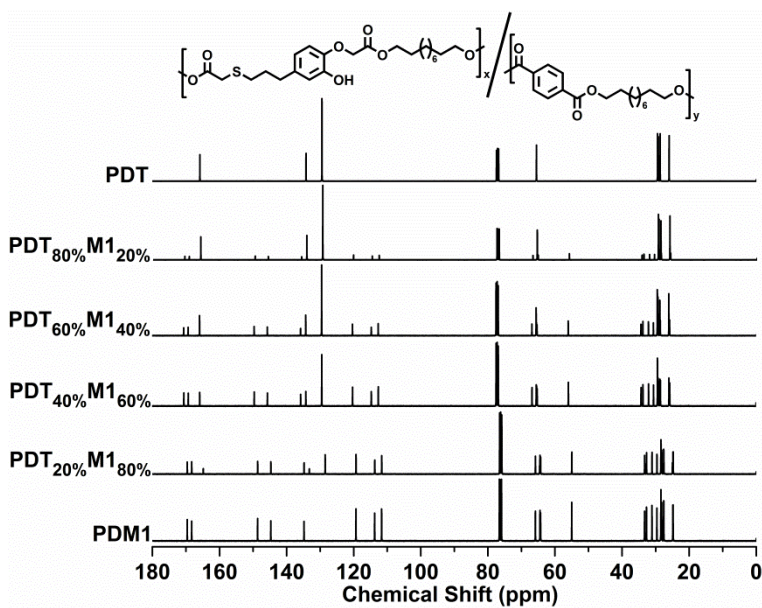

Fig. S7  $^{13}\text{C}$  NMR spectra of  $\text{PDT}_{1-x}\text{M1}_x$  copolyesters.

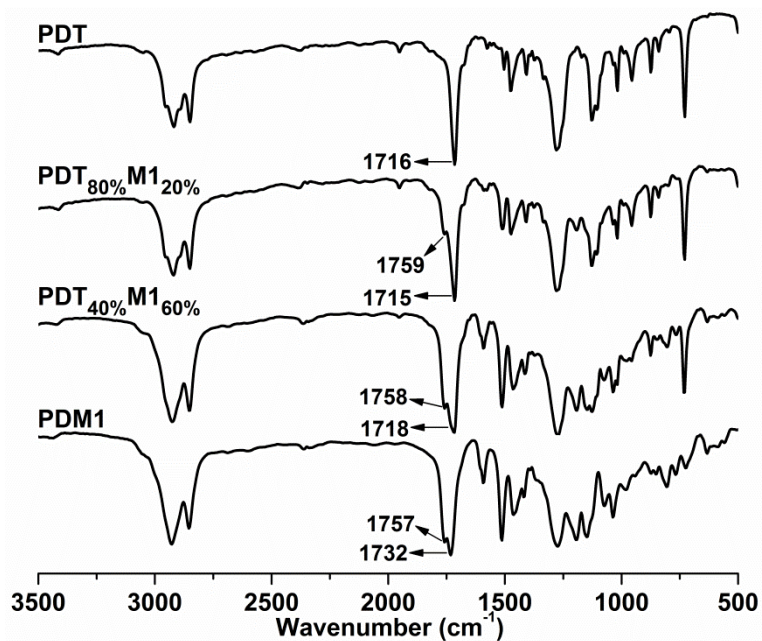

Fig. S8 FTIR spectra of PDT, PDM1 homopolyesters and PDT<sub>80%</sub>M1<sub>20%</sub>,

PDT<sub>40%</sub>M1<sub>60%</sub> copolyesters.

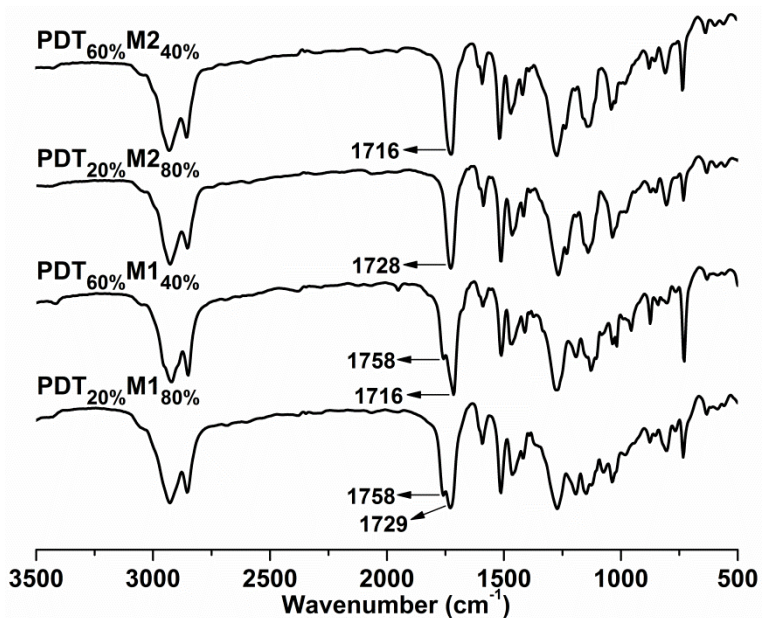

Fig. S9 FTIR spectra of PDT<sub>60%</sub>M1<sub>40%</sub>, PDT<sub>20%</sub>M1<sub>80%</sub>, PDT<sub>60%</sub>M2<sub>40%</sub>

and PDT<sub>20%</sub>M2<sub>80%</sub> copolyesters.

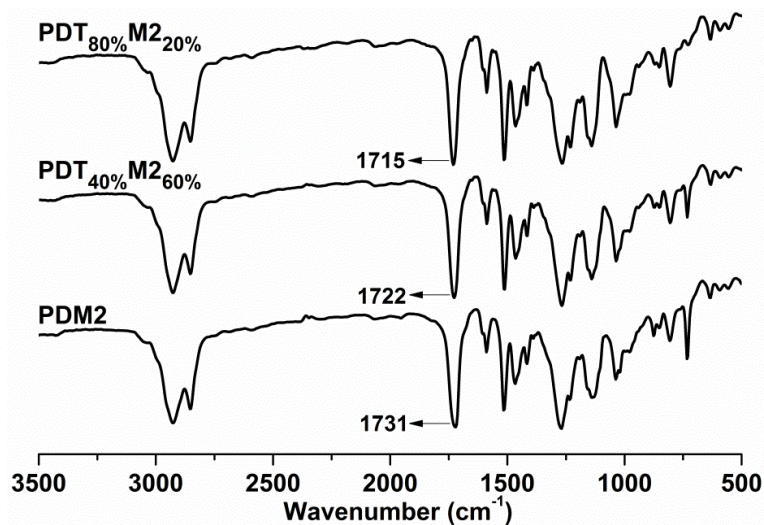

Fig. S10 FTIR spectra of  $\text{PDM2}$  homopolyester and  $\text{PDT}_{80\%}\text{M2}_{20\%}$ ,  $\text{PDT}_{40\%}\text{M2}_{60\%}$  copolyesters.

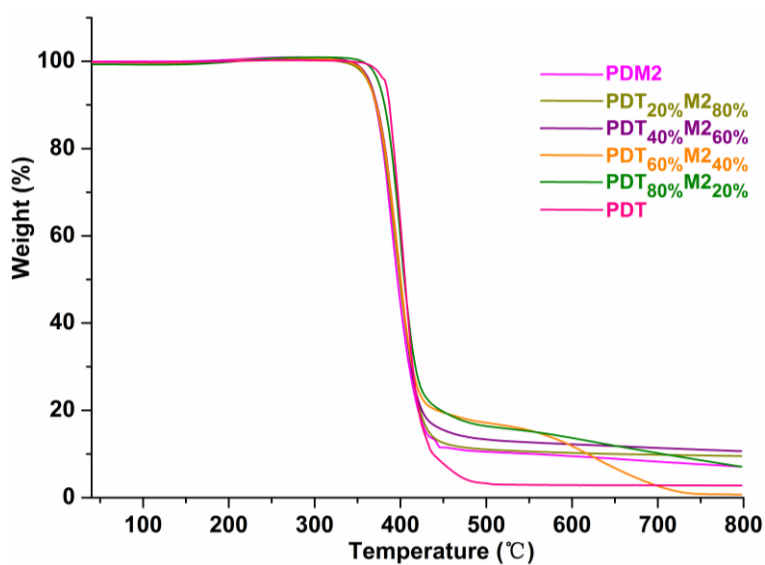

Fig. S11 TGA curves of  $\text{PDT}_{1-x}\text{M2}_x$  copolyesters recorded from 25-800  $^{\circ}\text{C}$  at a heating rate of 10  $^{\circ}\text{C min}^{-1}$  under a nitrogen atmosphere.



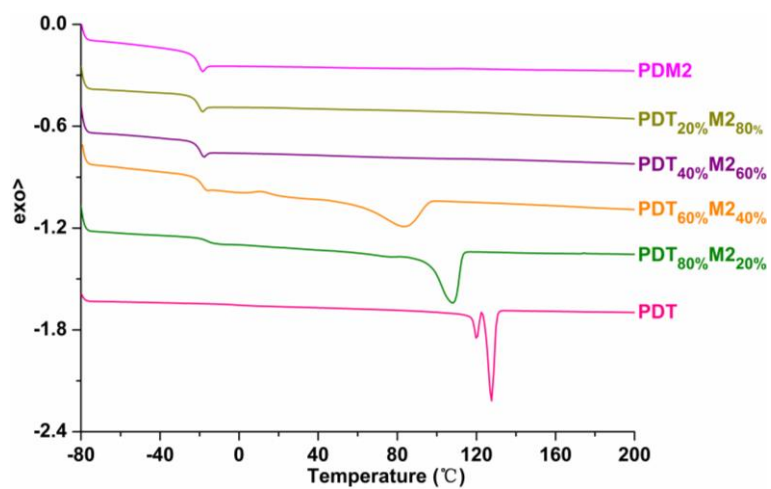

**Fig. S12** Second heating DSC curves of  $\text{PDT}_{1-x}\text{M2}_x$  copolyesters coming directly from synthesis

carried out from  $-80\text{--}200\text{ }^\circ\text{C}$  at a heating/cooling rate of  $10\text{ }^\circ\text{C min}^{-1}$ .

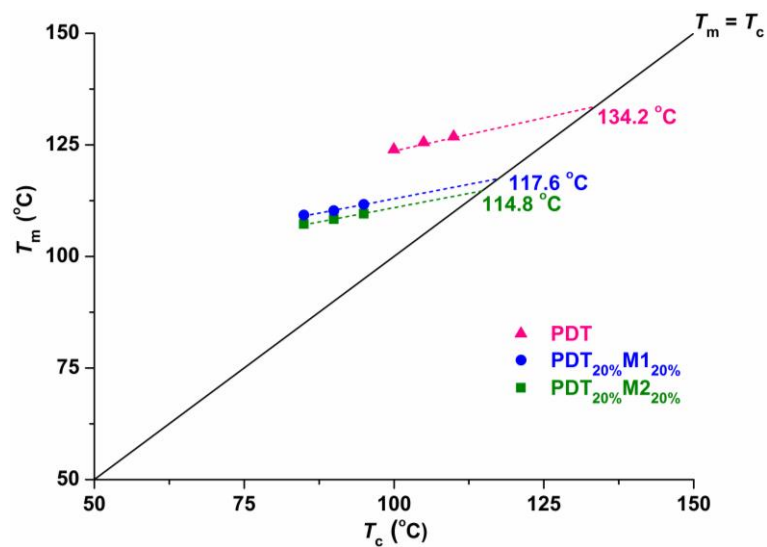

**Fig. S13** Hoffman-Weeks plots for isothermally crystallized samples of **PDT** homopolymer

and  $\text{PDT}_{80\%}\text{M1}_{20\%}$ ,  $\text{PDT}_{80\%}\text{M2}_{20\%}$  copolyesters.

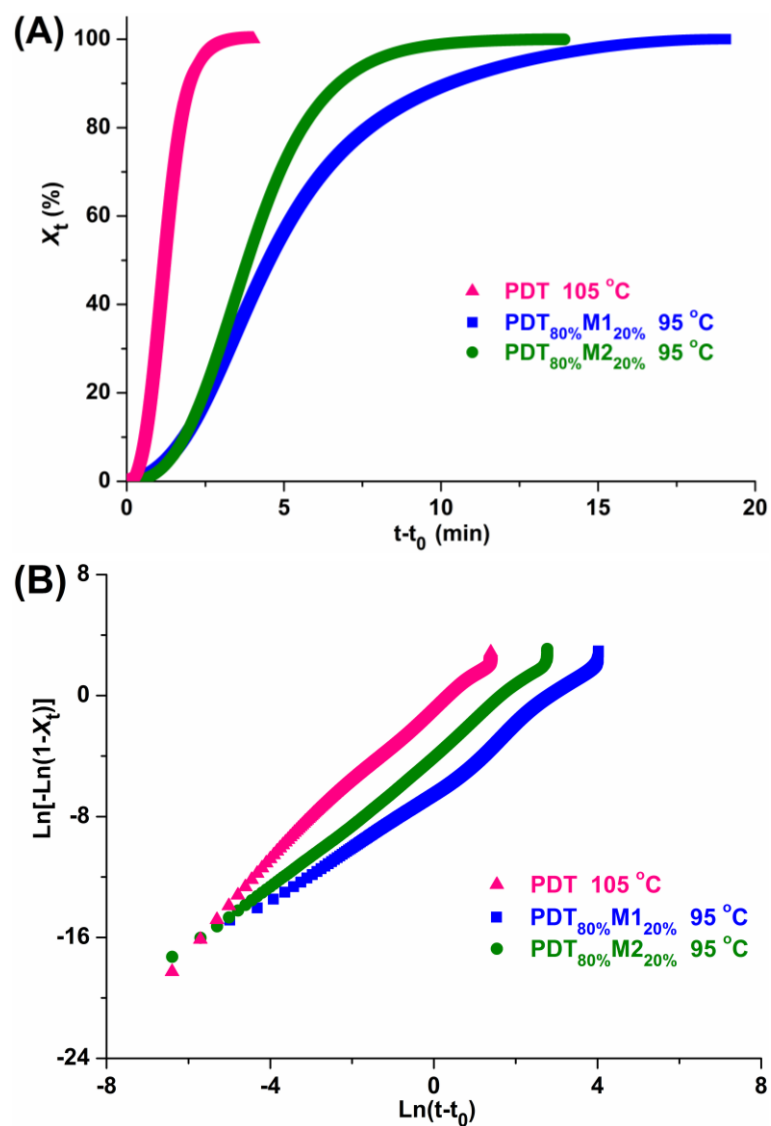

**Fig. S14** Isothermal crystallization of **PDT**, **PDT<sub>80%</sub>M1<sub>20%</sub>** and **PDT<sub>80%</sub>M2<sub>20%</sub>** at the indicated temperatures. Evolution of the relative crystallinity versus time plot (A) and Avrami plot (B).



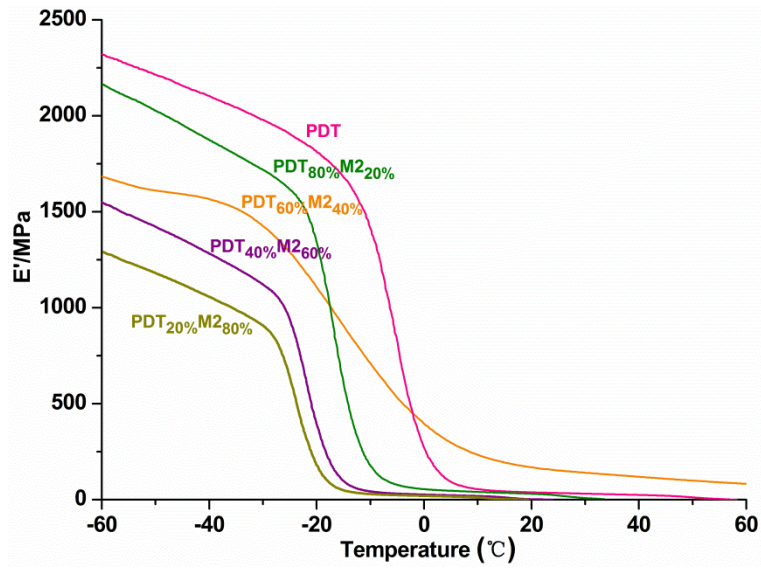

**Fig. S15** Storage modulus as a function of temperature for  $\text{PDT}_{1-x}\text{M}_2_x$  copolyesters.

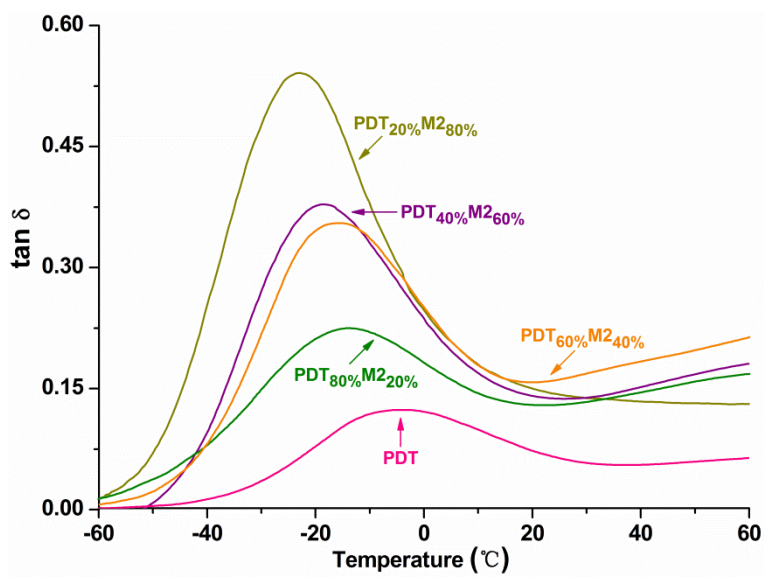

**Fig. S16**  $\tan \delta$  as a function of temperature for  $\text{PDT}_{1-x}\text{M}_2_x$  copolyesters.
